# Supplementary material
Source: Springer Nature journal article supplement (https://www.springermedizin.de/resource/supplementary/13034_2013_245_MOESM3_ESM.pdf/9652628)

Estimated Marginal Means of Score

Estimated Marginal Means

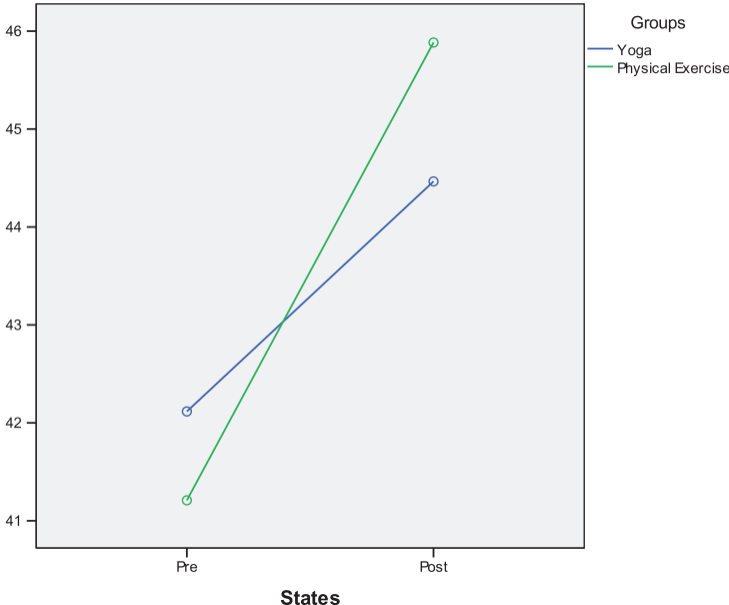

Supplement: MOESM3 [file 9652628]
